# Supplementary material for: Crystalline Cu-silicide stabilizes the performance of a high capacity Si-based Li-ion battery anode
Source: Royal Society of Chemistry journal article supplement (doi:10.1039/c6ta08740j), 2016-01-01
Supplement: c6ta08740j1.pdf [file c6ta08740j1.pdf]

**Electronic Supplementary Information**

**for**

**Crystalline Cu-silicide stabilizes the performance of a high  
capacity Si-based Li-ion battery anode†**

Wenqing Ma,<sup>a</sup> Xizheng Liu,<sup>b\*</sup> Xi Wang,<sup>c</sup> Zhifeng Wang,<sup>b,d</sup> Ruie Zhang,<sup>b</sup> Zhihao Yuan<sup>a,b</sup> and Yi Ding<sup>a,b</sup>

*<sup>a</sup>School of Materials Science and Engineering, Tianjin University, Tianjin 300350, P.R.*

*China.*

*<sup>b</sup>Tianjin Key Laboratory of Advanced Functional Porous Materials, Institute for New*

*Energy Materials and Low-Carbon Technologies, School of Materials Science and*

*Engineering, Tianjin University of Technology, Tianjin 300384, P.R. China.*

*<sup>c</sup>School of Sciences, Beijing Jiaotong University, Beijing 100044, P.R. China.*

*<sup>d</sup>School of Materials Science and Engineering, Hebei University of Technology, Tianjin*

*300310, P.R. China.*

\* Corresponding author: [xzliu@tjut.edu.cn](mailto:xzliu@tjut.edu.cn)

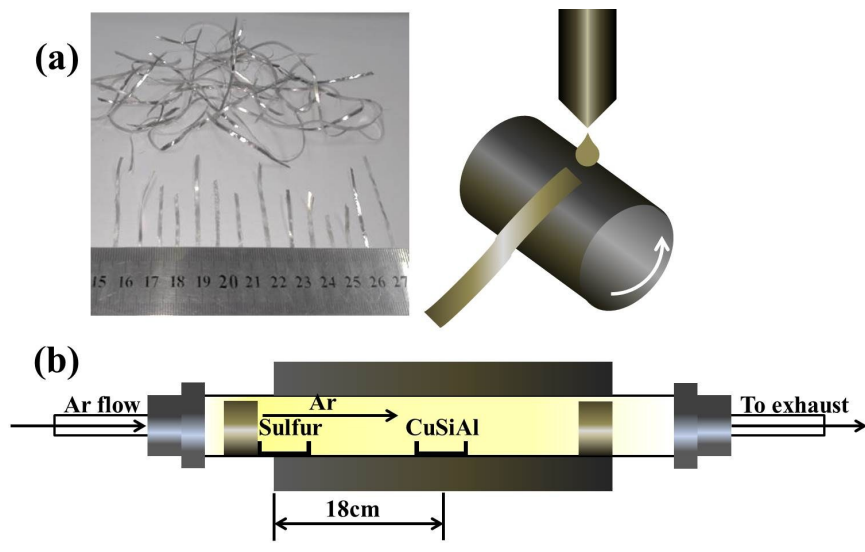

**Fig. S1** a) The as-prepared melt spun Cu-Si-Al ribbon (left), and simplified schematics of melt spinner (right). b) Schematic diagram illustrate the Cu-Si-Al-S alloy synthesis setup using a flow tube reactor.

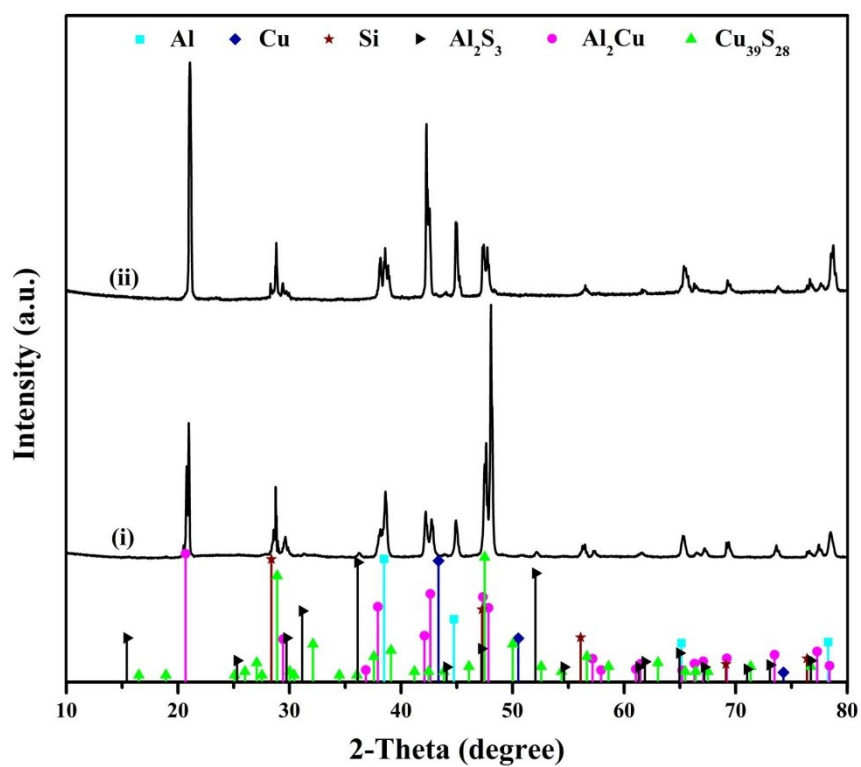

**Fig. S2** XRD patterns of i) Cu-Si-Al-S alloy, ii) Cu-Si-Al-S alloy after water etching at 60°C for 36h.

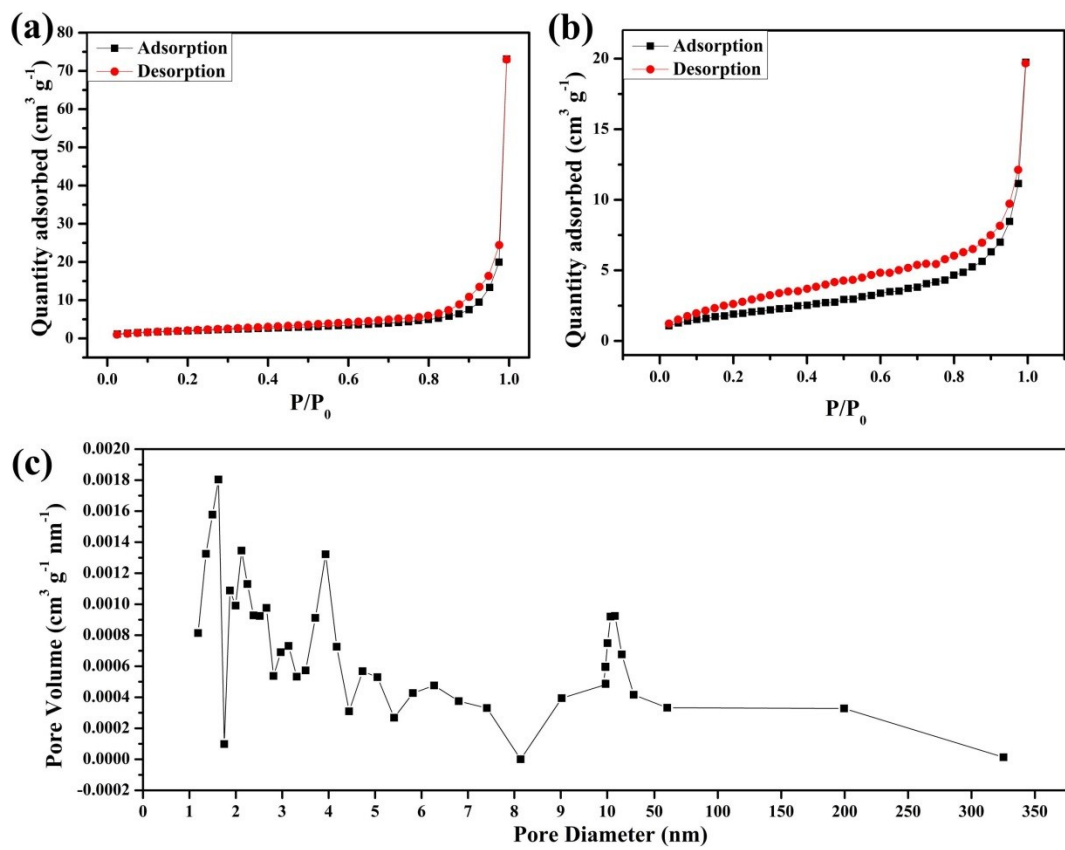

**Fig. S3**  $N_2$  adsorption isotherms of a)  $Si_{SERE}$  and b) HMSi. c) BJH pore size distribution curve of  $Si_{SERE}$ .

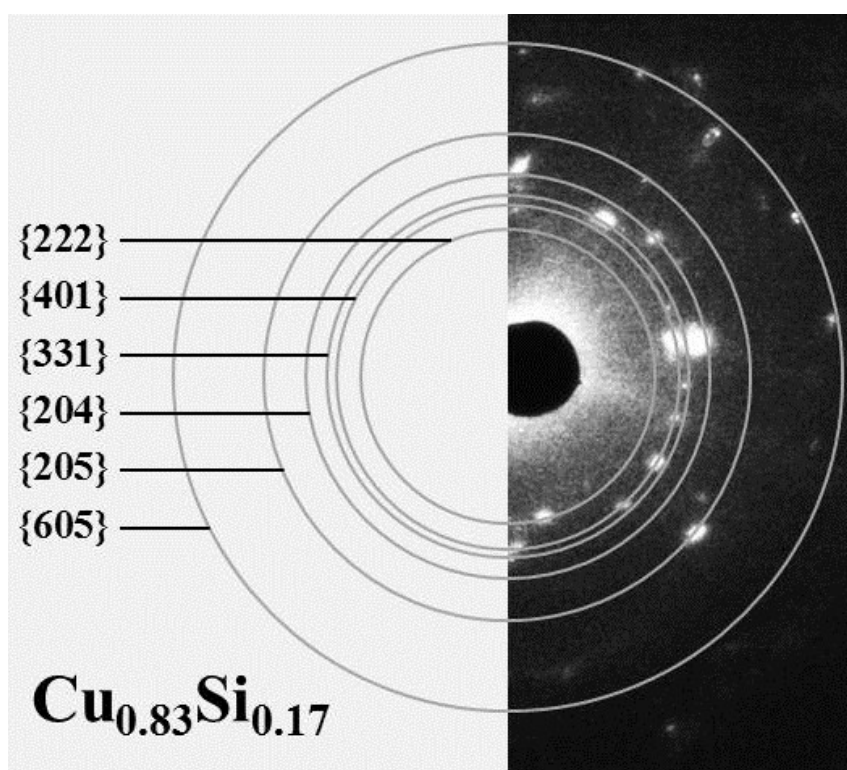

**Fig. S4** SAED pattern of pure  $\text{Cu}_{0.83}\text{Si}_{0.17}$  particles.

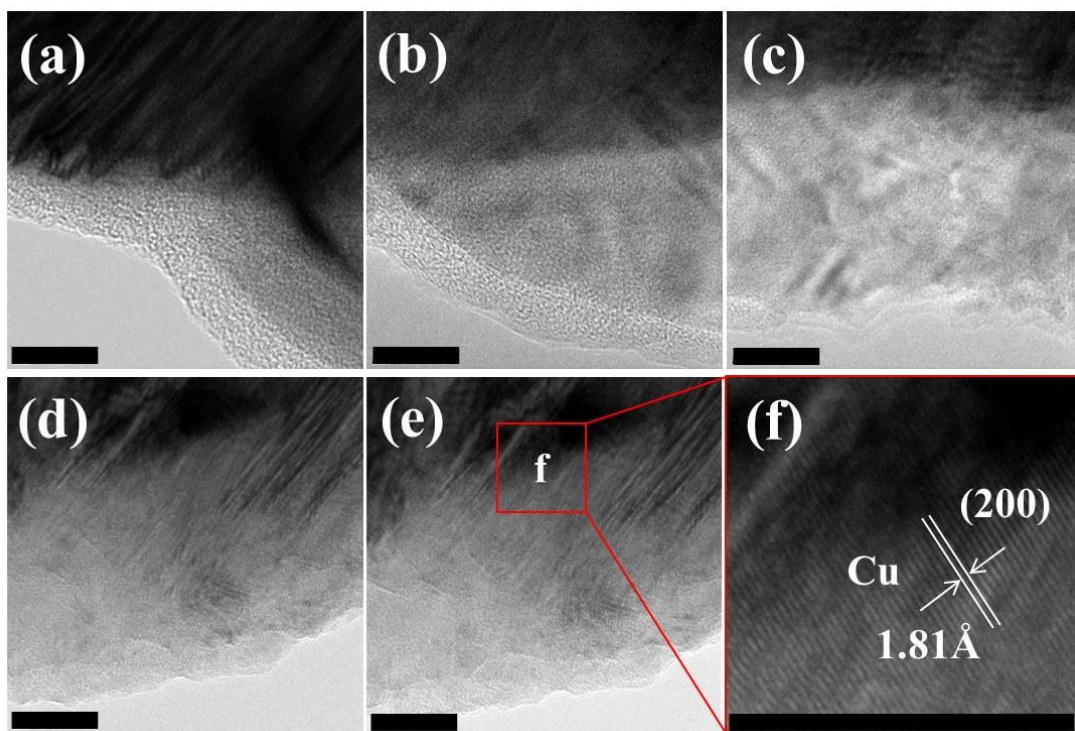

**Fig. S5** HRTEM images of Si<sub>SERE</sub> composite obtained by the In situ TEM experiment during the first lithiation (the scale bar is 10 nm).

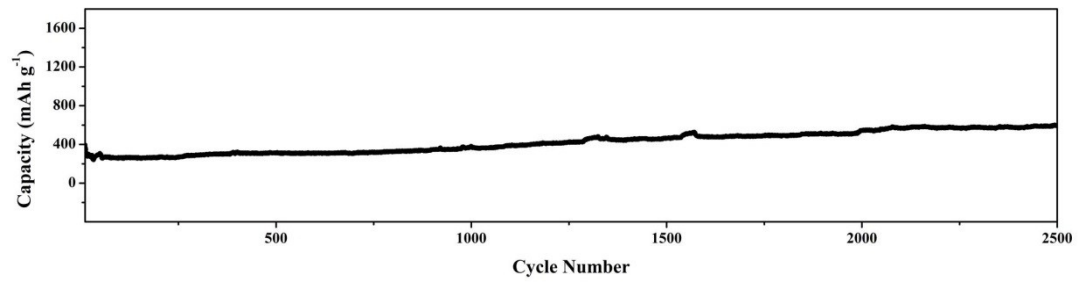

**Fig. S6** Long-term cycling stability of Si<sub>SERE</sub> electrode at a current density of 12 A g<sup>-1</sup>.

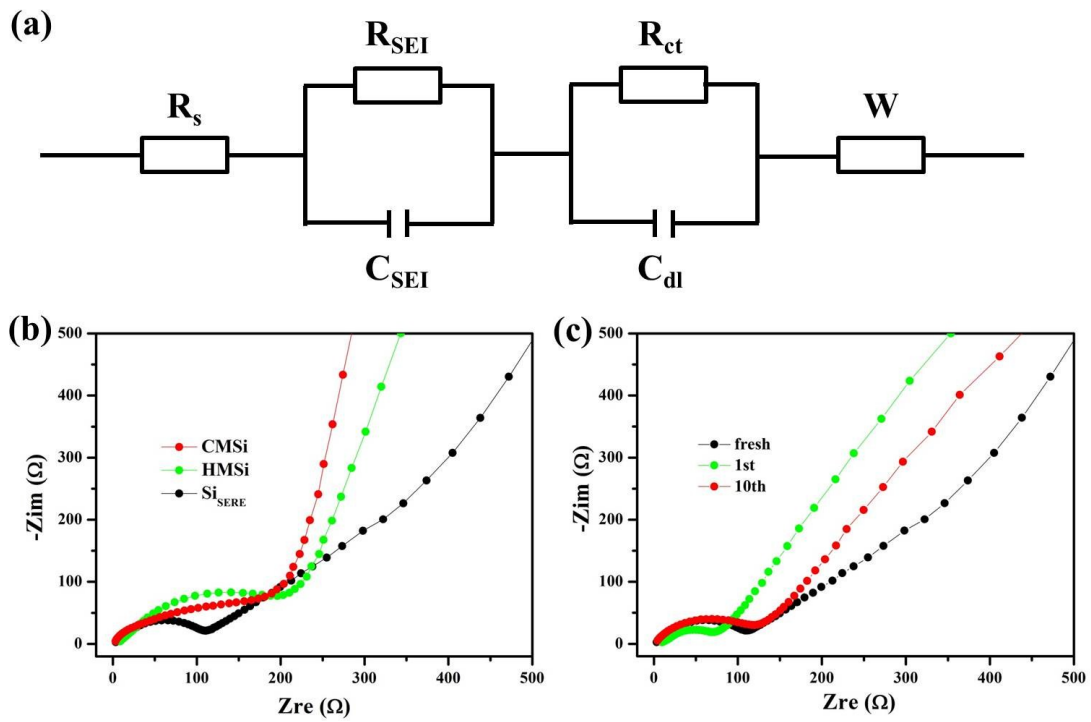

**Fig. S7** a) An equivalent circuit model to fit the Nyquist plots. Nyquist plots of b)  $\text{Si}_{\text{SERE}}$ , HMSi, and CMSi at the fresh state; c)  $\text{Si}_{\text{SERE}}$  at different cycling stages by applying a sine wave with an amplitude of 20 mV over a frequency range of 100 kHz to 0.01Hz.



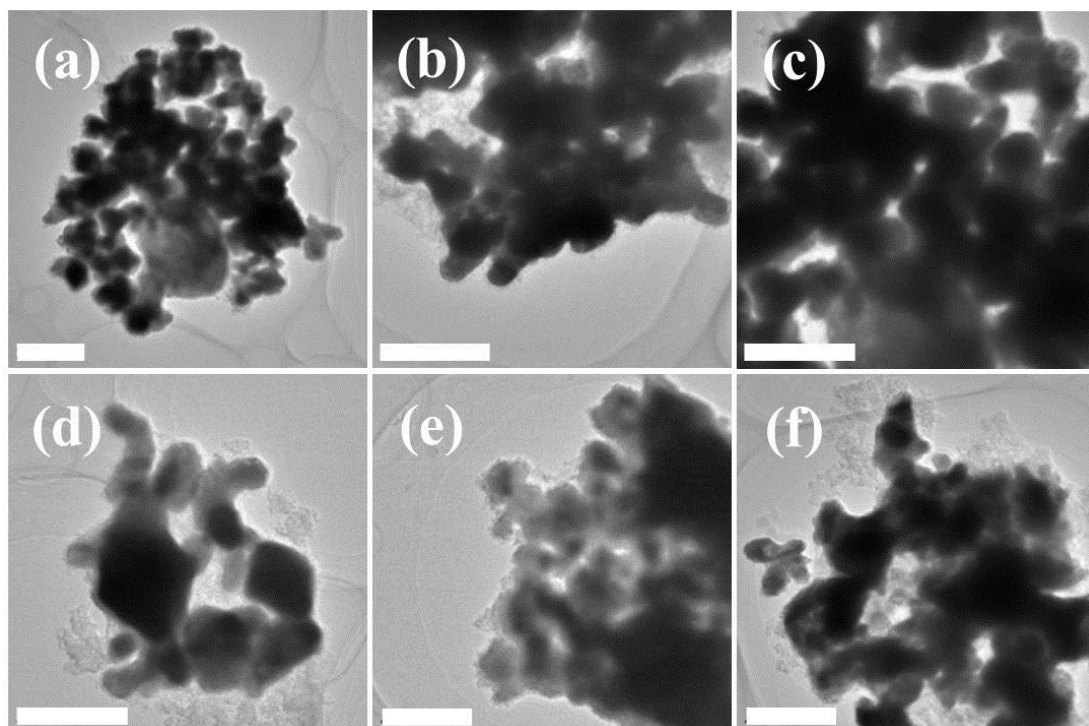

**Fig. S8** TEM images of Si<sub>SERE</sub> electrode after 200 cycles at 1.5 A g<sup>-1</sup> (the scale bar is 500nm).

Table S1 The EIS fitting results of different electrode materials at the fresh state.

|                    | $R_s$ ( $\Omega$ ) | $R_{ct}$ ( $\Omega$ ) |
|--------------------|--------------------|-----------------------|
| Si <sub>SERE</sub> | 14.26              | 71.7                  |
| HMSi               | 5.272              | 160.4                 |
| CMSi               | 14.09              | 199.6                 |
